# Supplementary material for: Zebrafish macrophage developmental arrest underlies depletion of microglia and reveals Csf1r-independent metaphocytes
Source: eLife journal article supplement (doi:10.7554/elife.53403), 2020-05-05

Figure S1

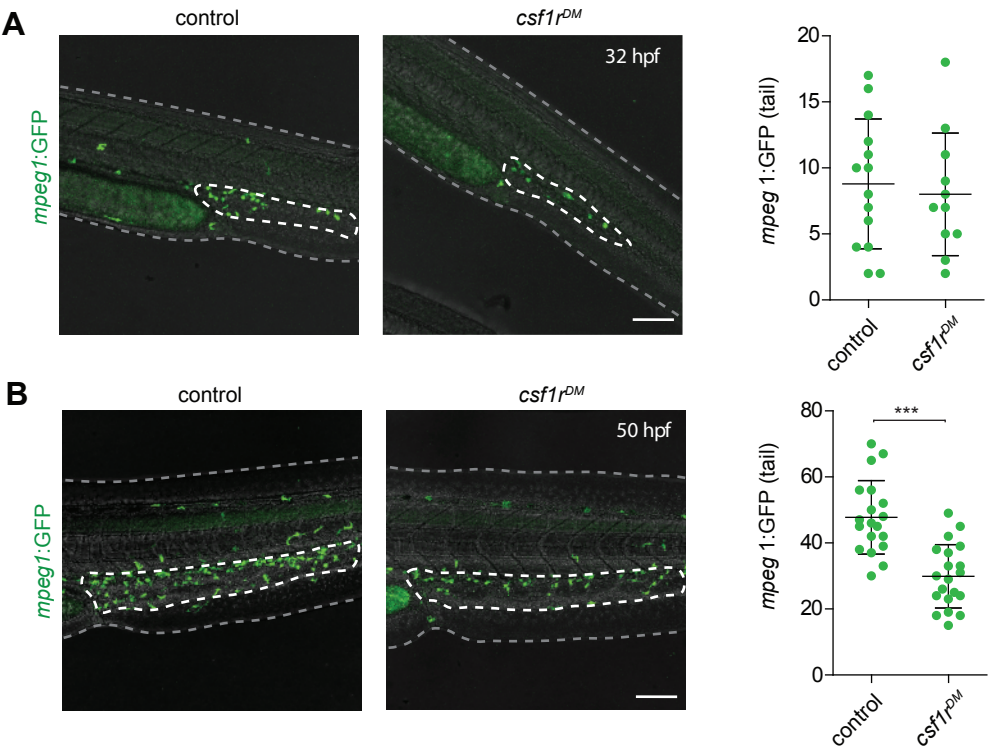

Supplement: supp [file elife-53403-supp-v1.zip]
